# Supplementary material
Source: Research Square preprint supplement (doi:10.21203/rs.3.rs-8447956/v1)
Supplement: Supplementary file 1 [file b481060128248e189c3a0b1e.xlsx]

## Sheet: Sheet1
Primer Name	Primer Sequence
q-LcBBM-F	GCTATCAAATTCCGTGGCCTA
q-LcBBM-R	CCGATTGGCAAAGTACTGCT
q-LcLEC1-F	AGCAGCGCAAGACAATCACT
q-LcLEC1-R	GGTCACCCTCTATCTCGCGGTA
q-LcPIN1-F	CTACCTCAAGGCATTGTTCCC
q-LcPIN1-R	CGAAAATAACCGCCGTGCTG
q-LcPLT2-F	CTACCACTACAAACTTTCCGAT
q-LcPLT2-R	CGCACCTCTTGAAAATCCACT
q-LcARF12-F	TCATCACCGTAACAAATGGGA
q-LcARF12-R	GAATTCCTGCCATGGATCGTC
q-LcARR7-F	ATTACTGATTATTGTATGCCTGA
q-LcARR7-R	TGGTATTTCTCTCCACGTTG
q-cyclin-p3-F	ACAGATTGGAGCTGAAATTCCT
q-cyclin-p3-R	GATGTGCTCCTCCAGTAGCTT
q-CDKF-4-F	CCTACGAATACAGGCATGTCGTT
q-CDKF-4-R	GATCGCATAGTGGACCCAACC
q-Expansin-A8 -F	CAGAACTGGCAGAGCAACTCC
q-Expansin-A8 -R	TGGCTCCCTTCGAACGTCT
